# Supplementary material
Source: publisher figshare collection journal article supplement (https://rs.figshare.com/ndownloader/files/12394937)
Supplement: Supplementary file [file 12394937]

**Table S2. Genetic structure of outlier genetic loci in *Tetrix undulata* according to sampling location and sex.** Analysis of amplified fragment length polymorphism (AFLP) [1, 2] was carried out using data for 323 individuals representing 20 sampling locations. A Bayesian approach implemented in BayeScan V.2.1 software [3] detected 28 AFLP outlier loci influenced by selection. Data on the outlier AFLP loci were analysed using permutational multivariate analysis of variance (PERMANOVA) [4, 5] to test for differences in genetic structures among different locations (treated as a random factor) and between sexes (fixed factor). Permutation tests used 9,999 unrestricted permutations and partial sums of squares type (Type III).

| Source of variation | <i>df</i> | SS     | MS     | Pseudo- <i>F</i> | <i>P</i> (perm) | Unique permutations | <i>P</i> (MC) |
|---------------------|-----------|--------|--------|------------------|-----------------|---------------------|---------------|
| Population          | 19        | 14414  | 758.62 | 17.244           | 0.0001          | 9846                | 0.0001        |
| Sex                 | 1         | 179.93 | 179.93 | 4.09             | 0.0057          | 9956                | 0.0082        |
| Residual            | 303       | 13330  | 43.993 |                  |                 |                     |               |
| Total               | 323       | 28206  |        |                  |                 |                     |               |

## Supporting References

1. Bensch S., Åkesson M. 2005. Ten years of AFLP in ecology and evolution: why so few animals. *Mol Ecol* **14**, 2899-2914.
2. Vos P., Hogers R., Bleeker M., Reijans M., van de Lee T., Hornes M., Frijters A., Pot J., Peleman J., Kuiper M., et al. 1995. AFLP: a new technique for DNA fingerprinting. *Nucleic Acids Research* **23**, 4407-4414.
3. Foll M., Gaggiotti O. 2008. A genome-scan method to identify selected loci appropriate for both dominant and codominant markers: A Bayesian perspective. *Genetics* **180**, 977-993.
4. Anderson M.J. 2001. A new method for non-parametric multivariate analysis of variance. *Austral Ecol* **26**, 32-46.
5. McArdle B.H., Anderson M.J. 2001. Fitting multivariate models to community data: a comment on distance based redundancy analysis. *Ecology* **82**, 290-297.
